# Supplementary material
Source: PubMed Central journal article supplement (PMC3811512)
Supplement: AEM.02057-13_zam999104816so1.pdf [file AEM.02057-13_zam999104816so1.pdf]

**Supporting Information for**  
**Probing 3-hydroxyflavone for *in vitro* glycorandomization of flavonols by**

**YjiC**

**Ramesh Prasad Pandey, Prakash Parajuli, Niranjan Koirala, Je Won Park, Jae Kyung Sohng**

*Institute of Biomolecule Reconstruction, Department of Pharmaceutical Engineering, Sun Moon University, 100*

*Kalsan-ri, Tangjeonmyun, Asan-si, Chungnam 336-708, Korea*

[sohng@sunmoon.ac.kr](mailto:sohng@sunmoon.ac.kr)

## Table of Contents

|                                                                                                                                                                                          |               |
|------------------------------------------------------------------------------------------------------------------------------------------------------------------------------------------|---------------|
| <b>Supplementary methods.....</b>                                                                                                                                                        | <b>S3-S6</b>  |
| General methods for cloning, expression and purification                                                                                                                                 |               |
| Glycosyltransferase activity assay                                                                                                                                                       |               |
| Product analysis                                                                                                                                                                         |               |
| <b>Supplementary results.....</b>                                                                                                                                                        | <b>S5-S14</b> |
| <b>Supplementary tables</b>                                                                                                                                                              |               |
| <b>Supplementary table 1.</b> Flavonols having 3-Hydroxy flavone backbone HPLC-PDA analysis.                                                                                             |               |
| <b>Supplementary table 2.</b> HPLC-PDA and HPLC-PDA-QTOF HR-ESI/MS analysis of 3-HF glycorandomized reaction mixtures.                                                                   |               |
| <b>Supplementary figures.....</b>                                                                                                                                                        | <b>S7-S14</b> |
| <b>Supplementary figure S1-S4.</b> HPLC-PDA-QTOF-ESI/MS analysis of fisetin ( <b>S1</b> ), quercetin ( <b>S2</b> ), myricetin ( <b>S3</b> ), kaempferol ( <b>S4</b> ) reaction mixtures. |               |
| <b>Supplementary figure S5.</b> HPLC-PDA-QTOF-ESI/MS analysis of 3-HF with different NDP-sugar donors and YjiC.                                                                          |               |
| <b>Supplementary figure S6.</b> Structures of glycorandomized 3-HF glycoside derivatives.                                                                                                |               |

## General methods for cloning, expression and purification

The *yjiC* gene was amplified by using primer pairs: *yjiC*-F/*yjiC*-R: *yjiC*F-5'-**GGATCC**ATGGGACATAAACATATCGCG-3' *Bam*HI and *yjiC*R-5'-**CTCGAG**TTATTTTACTCCTGCGGGTGCTAA-3' *Xho*I (Bold and underlined sequence represents the restriction enzyme site) using total genomic DNA of *Bacillus licheniformis* DSM-13 as a template. The 1,191 bp long fragment of *yjiC* was excised from pGEM®-T vector by *Bam*HI/*Xho*I and was cloned into the same sites of pET28a (+) to generate the recombinant expression vector pET28-YjiC. pET28-YjiC was transformed into *E. coli* BL21 (DE3) using the heat shock transformation method. 50  $\mu$ L of *E. coli* BL21 (DE3) harboring pET28-YjiC was cultured overnight and was inoculated into 50 mL LB medium and incubated at 37°C until absorbance at 600 nm ( $OD_{600}$ ) reached to 0.5-0.7. The culture was induced with 0.5 mM of isopropyl- $\beta$ -D-thiogalactopyranoside (IPTG) followed by continued growth at 20°C with shaking for 20 h. The cells were harvested by centrifugation at 3,000 rpm for 10 min, washed twice with 100 mM Tris-Cl (pH: 8.0) and resuspended in 1 mL of the same buffer. The cells were lysed by sonication and the lysate was cleared by centrifugation (12,000 rpm) for 30 min at 4°C. Cleared lysate was mixed with 1 mL of Ni-nitrilotriacetic acid (Ni-NTA) agarose (Qiagen, Valencia, CA, USA) and was purified according to the manufacturer's instructions. Fractions containing purified protein were assessed via sodium dodecyl sulfate-polyacrylamide gel electrophoresis (12% SDS-PAGE), and were concentrated using Amicon Ultra-15 (Millipore, 10K NMWL centrifugal filters). The purified protein was stored in the buffer containing 100 mM Tris-HCl (pH 8.0) and 20% [v/v] glycerol until use. Protein concentration was determined by the Bradford assay kit from Bio-Rad (Hercules, CA, USA). 3-hydroxyflavone, fisetin, quercetin, kaempferol, and myricetin were purchased from Sigma-Aldrich (USA). UDP- $\alpha$ -D-glucose, UDP- $\alpha$ -D-galactose, UDP- $\alpha$ -D-glucuronic acid, and

UDP-*N*-acetyl glucosamine were purchased from Sigma-Aldrich (USA). TDP-L-rhamnose and GDP-L-fucose was purchased from GeneChem (Daejeon, Korea) TDP- $\alpha$ -D-2-deoxyglucose and TDP- $\alpha$ -D-viosamine was gifted by Dr. Dae Hee Kim (GeneChem, Daejeon, Korea). All other chemicals used in the study are of highest chemical grade.

### **Glycosyltransferase activity assay**

The reactions for YjiC were carried out in a total volume of 100  $\mu$ l of reaction mixture containing 100 mM Tris-Cl (pH 8.8), 4 mM NDP-sugar, 2 mM acceptor substrate, 2 mM MgCl<sub>2</sub> and 40  $\mu$ g/mL of appropriately diluted enzyme. The reaction mixture was incubated at 30°C for 4 h. The assay mixtures lacking enzyme served as controls. The reaction was quenched by addition of double volume of chilled methanol, centrifuged to remove proteins, and the reaction product was monitored by HPLC-PDA after proper dilution.

### **Analytical methods**

Reverse-phase HPLC-PDA analysis was performed with a C18 column (Mightysil RP-18 GP (4.6x250, 5 $\mu$ m) connected to a photo diode array using binary condition of H<sub>2</sub>O (0.1% trifluoroacetic acid buffer) and 100% acetonitrile (ACN) at a flow rate of 1 mL/min for 25 minutes. The concentration of ACN is as follows: 20% (0-5) min, 50% (5-10) min, 70% (10-15) min, 90% (15-20) min, 10% (20-25) min. The molecular weight of the products were confirmed by high resolution mass spectra obtained in positive mode from LC-QTOF-ESI-MS/MS [ACQUITY (UPLC, Waters Corp., USA)-SYNAPT G2-S (Waters Corp., USA)].

## Supplementary results

**Supplementary table 1.** HPLC-PDA analysis of flavonols sharing 3-hydroxyflavone backbone.

| <b>Compound</b>   | <b>Types of glucoside</b> | <b>Retention time (<math>t_R</math>) min</b> |
|-------------------|---------------------------|----------------------------------------------|
| <b>Fisetin</b>    | Aglycone standard         | 14.6                                         |
| F <sub>1</sub>    | Monoglucoside             | 11.8                                         |
| F <sub>2</sub>    | Diglucoside               | 11.4                                         |
| F <sub>3</sub>    | Diglucoside               | 10.7                                         |
| F <sub>4</sub>    | Triglucoside              | 10.0                                         |
| <b>Quercetin</b>  | Aglycone standard         | 15.3                                         |
| Q <sub>1</sub>    | Monoglucoside             | 14.2                                         |
| Q <sub>2</sub>    | Diglucoside               | 13.1                                         |
| Q <sub>3</sub>    | Diglucoside               | 12.7                                         |
| Q <sub>4</sub>    | Triglucoside              | 12.2                                         |
| Q <sub>5</sub>    | Triglucoside              | 11.3                                         |
| Q <sub>6</sub>    | Tetraglucoside            | 10.7                                         |
| <b>Myricetin</b>  | Aglycone standard         | 14.5                                         |
| M <sub>1</sub>    | Monoglucoside             | 12.1                                         |
| M <sub>2</sub>    | Diglucoside               | 11.6                                         |
| M <sub>3</sub>    | Triglucoside              | 11.3                                         |
| M <sub>4</sub>    | Tetraglucoside            | 10.5                                         |
| <b>Kaempferol</b> | Aglycone standard         | 16.5                                         |
| K <sub>1</sub>    | Monoglucoside             | 13.9                                         |
| K <sub>2</sub>    | Diglucoside               | 12.3                                         |
| K <sub>3</sub>    | Diglucoside               | 12.0                                         |
| K <sub>4</sub>    | Triglucoside              | 10.3                                         |

**Supplementary table 2.** HPLC-PDA and HPLC-PDA-QTOF-ESI/MS analysis of 3-HF glycorandomized reaction mixtures.

| Compound                                        | Retention time ( $t_R$ ) min | Ion formula                                               | Calculated $m/z$ | Observed $m/z$ |
|-------------------------------------------------|------------------------------|-----------------------------------------------------------|------------------|----------------|
| 3-HF 3- <i>O</i> - $\beta$ -D-glucoside         | 16.8                         | $C_{21}H_{21}O_8$<br>[M+glucose]+H <sup>+</sup>           | 401.123643       | 401.1271       |
|                                                 |                              | $C_{21}H_{20}NaO_8$<br>[M+glucose]+Na <sup>+</sup>        | 423.105588       | 423.1054       |
| 3-HF 3- <i>O</i> - $\beta$ -D-galactoside       | 16.8                         | $C_{21}H_{21}O_8$<br>[M+galactose]+H <sup>+</sup>         | 401.123643       | 401.1298       |
|                                                 |                              | $C_{21}H_{20}NaO_8$<br>[M+galactose]+Na <sup>+</sup>      | 423.105588       | 423.1057       |
| 3-HF 3- <i>O</i> - $\beta$ -D-viosaminoside     | 17.0                         | $C_{21}H_{22}NO_6$<br>[M+viosamine]+H <sup>+</sup>        | 384.144713       | 384.1453       |
| 3-HF 3- <i>O</i> - $\beta$ -D-2-deoxy-glucoside | 17.0                         | $C_{21}H_{20}NaO_7$<br>[M+2-deoxyglucose]+Na <sup>+</sup> | 407.110673       | 407.1098       |
| 3-HF 3- <i>O</i> - $\beta$ -L-fucoside          | 16.9                         | $C_{21}H_{20}NaO_7$<br>[M+fucose]+Na <sup>+</sup>         | 407.1107         | 407.1108       |
| 3-HF 3- <i>O</i> - $\beta$ -L-rhamnoside        | 16.8                         | $C_{21}H_{20}NaO_7$<br>[M+rhamnose]+Na <sup>+</sup>       | 407.1107         | 407.1094       |
| UDP- <i>N</i> -Acetylglucosamine                | ND                           | ND                                                        | ND               | ND             |
| UDP-glucuronic acid                             | ND                           | ND                                                        | ND               | ND             |

ND: not detected.

## Supplementary Figures

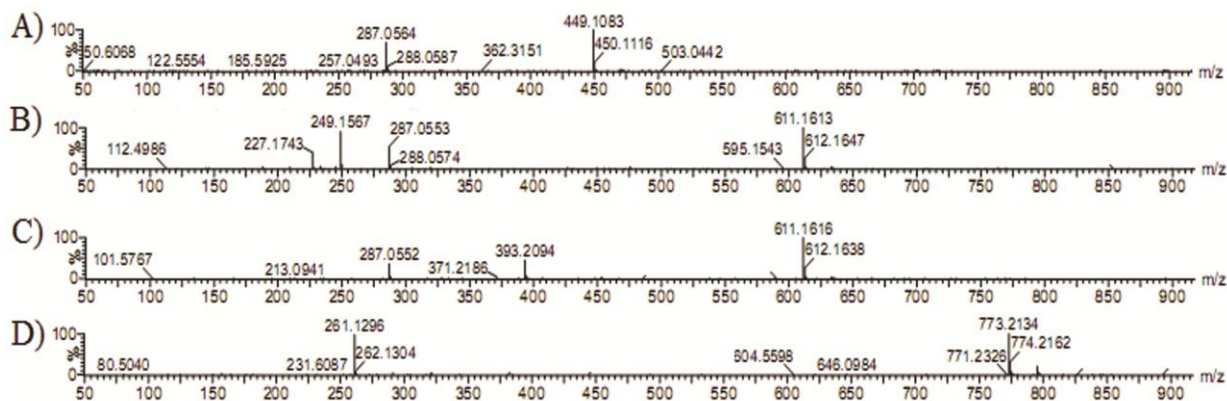

**Supplementary figure S1.** HPLC-PDA-QTOF-ESI/MS analysis of fisetin reaction mixture.

A) Mass of fisetin monoglucoside F<sub>1</sub>,  $t_R$ : 11.8 min,  $[M+H]^+$   $m/z^+$ ~449.1083. B) Mass of fisetin diglucoside F<sub>2</sub>,  $t_R$ : 11.4 min,  $[M+H]^+$   $m/z^+$ ~611.1613. C) Mass of fisetin diglucoside F<sub>3</sub>,  $t_R$ : 10.7 min,  $[M+H]^+$   $m/z^+$ ~611.1616. D) Mass of fisetin triglucoside F<sub>4</sub>,  $t_R$ : 10.0 min,  $[M+H]^+$   $m/z^+$ ~773.2134. Mass of fisetin aglycone,  $[M+H]^+$   $m/z^+$ ~287.0556.

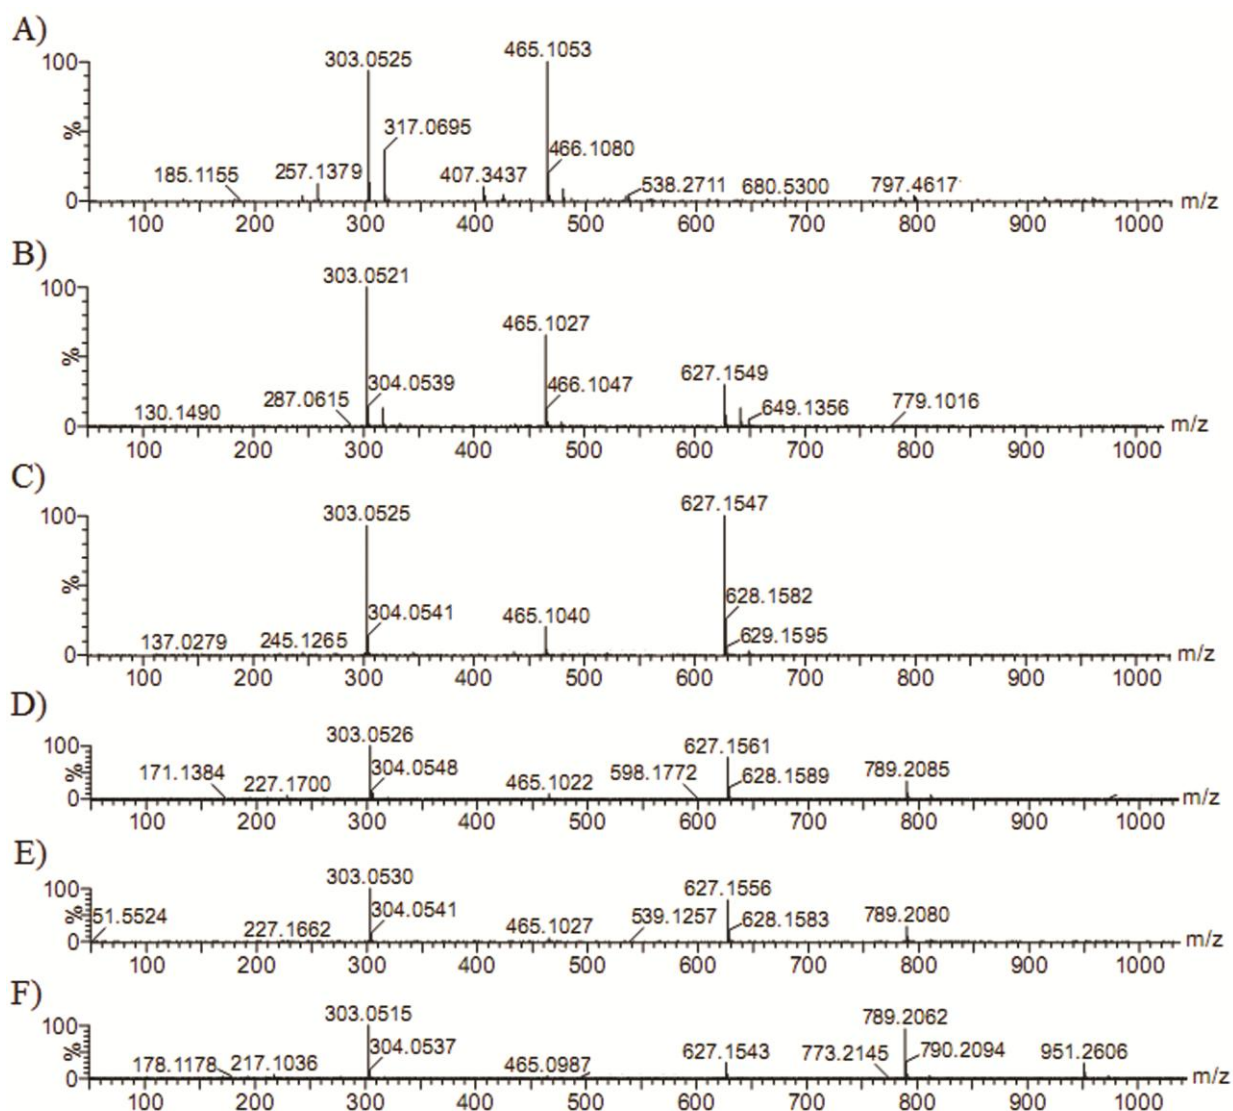

**Supplementary figure S2.** HPLC-PDA-QTOF-ESI/MS analysis of quercetin reaction mixture. A) Mass of quercetin monoglucoside Q<sub>1</sub>,  $t_R$ : 14.2 min,  $[M+H]^+m/z^+ \sim 465.1053$ . B) Mass of quercetin diglucoside Q<sub>2</sub>,  $t_R$ : 13.1 min,  $[M+H]^+m/z^+ \sim 627.1549$ . C) Mass of quercetin diglucoside Q<sub>3</sub>,  $t_R$ : 12.7 min,  $[M+H]^+m/z^+ \sim 627.1547$ . D) Mass of quercetin triglucoside Q<sub>4</sub>,  $t_R$ : 12.2 min,  $[M+H]^+m/z^+ \sim 789.2085$ . E) Mass of quercetin triglucoside Q<sub>5</sub>,  $t_R$ : 11.3 min,  $[M+H]^+m/z^+ \sim 789.2080$ , and F) Mass of quercetin tetraglucoside Q<sub>6</sub>,  $t_R$ : 10.7 min,  $[M+H]^+m/z^+ \sim 951.2606$ . Mass of quercetin aglycone,  $[M+H]^+m/z^+ \sim 303.0505$ .



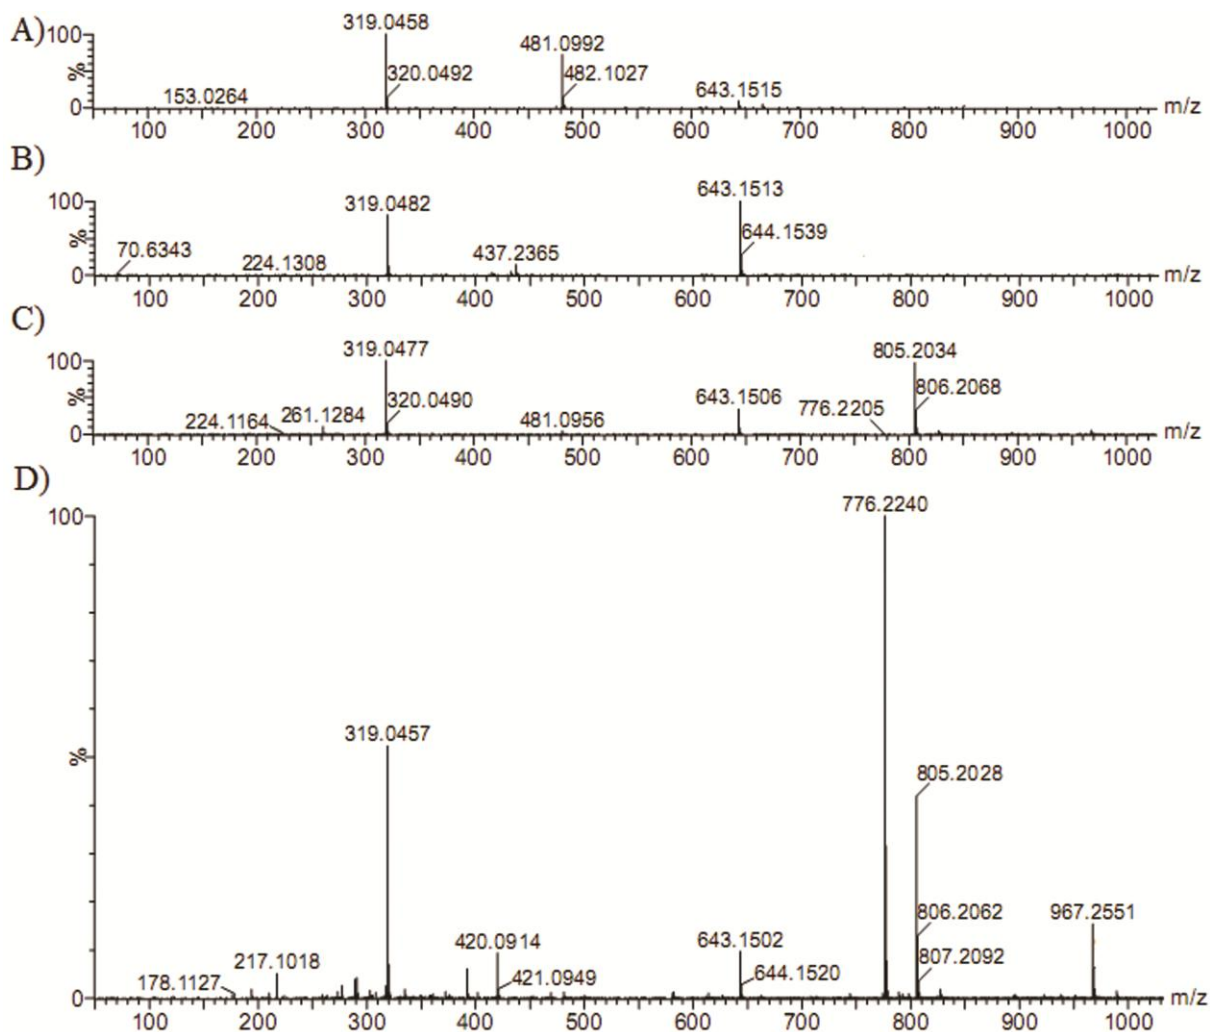

**Supplementary figure S3.** HPLC-PDA-QTOF-ESI/MS analysis of myricetin reaction mixture. A) Mass of myricetin monoglucoside  $M_1$ ,  $t_R$ : 12.1 min,  $[M+H]^+$   $m/z^+ \sim 481.0992$ . B) Mass of myricetin diglucoside  $M_2$ ,  $t_R$ : 11.6 min,  $[M+H]^+$   $m/z^+ \sim 643.1513$ . C) Mass of myricetin triglucoside  $M_3$ ,  $t_R$ : 11.3 min,  $[M+H]^+$   $m/z^+ \sim 805.2034$ , and D) Mass of myricetin tetraglucoside  $M_4$ ,  $t_R$ : 10.5 min,  $[M+H]^+$   $m/z^+ \sim 967.2551$ . Mass of myricetin aglycone,  $[M+H]^+$   $m/z^+ \sim 319.0454$ .

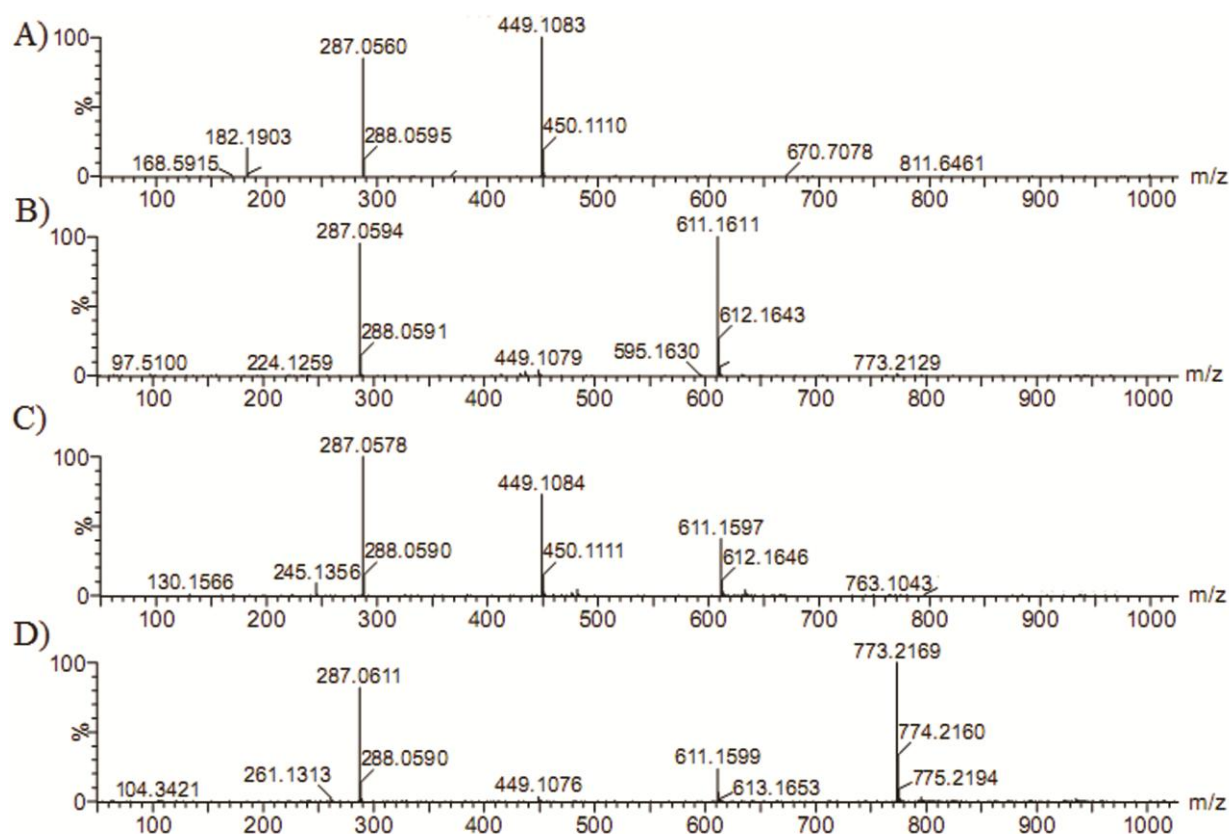

**Supplementary figure S4.** HPLC-PDA-QTOF HR-ESI/MS analysis of kaempferol reaction mixture. A) Mass of kaempferol monoglucoside  $K_1$ ,  $t_R$ : 13.9 min,  $[M+H]^+m/z^+ \sim 449.1083$ . B) Mass of kaempferol diglucoside  $K_2$ ,  $t_R$ : 12.3 min,  $[M+H]^+m/z^+ \sim 611.1611$ . C) Mass of kaempferol diglucoside  $K_3$ ,  $t_R$ : 12 min,  $[M+H]^+m/z^+ \sim 611.1597$ , and D) Mass of kaempferol triglucoside  $K_4$ ,  $t_R$ : 10.3 min,  $[M+H]^+m/z^+ \sim 773.2169$ . Mass of kaempferol aglycone,  $[M+H]^+m/z^+ \sim 287.0556$ .

**A)**

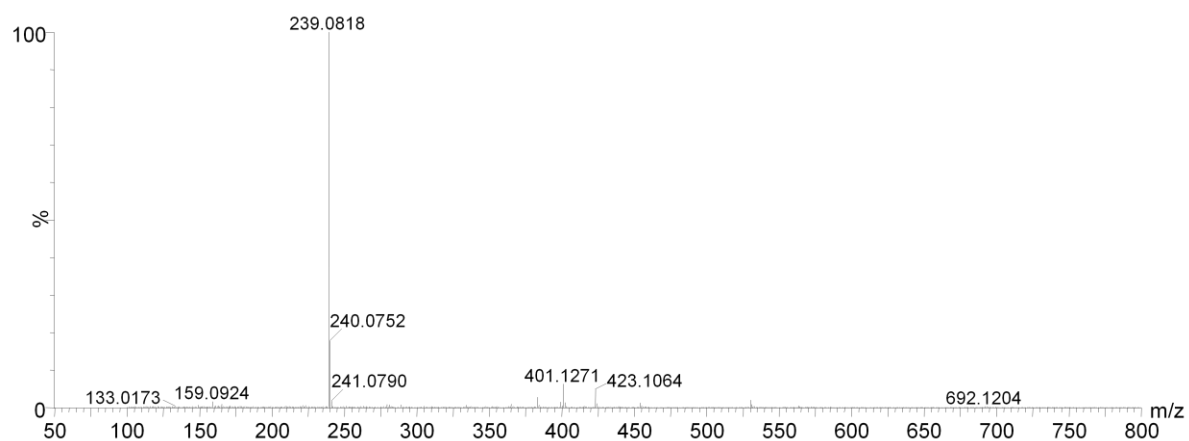

**B)**

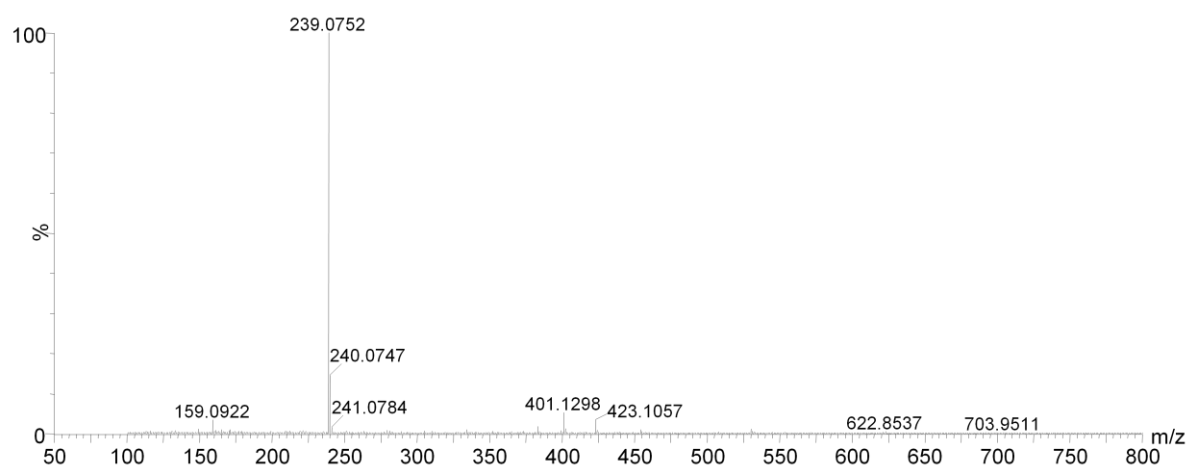

**C)**

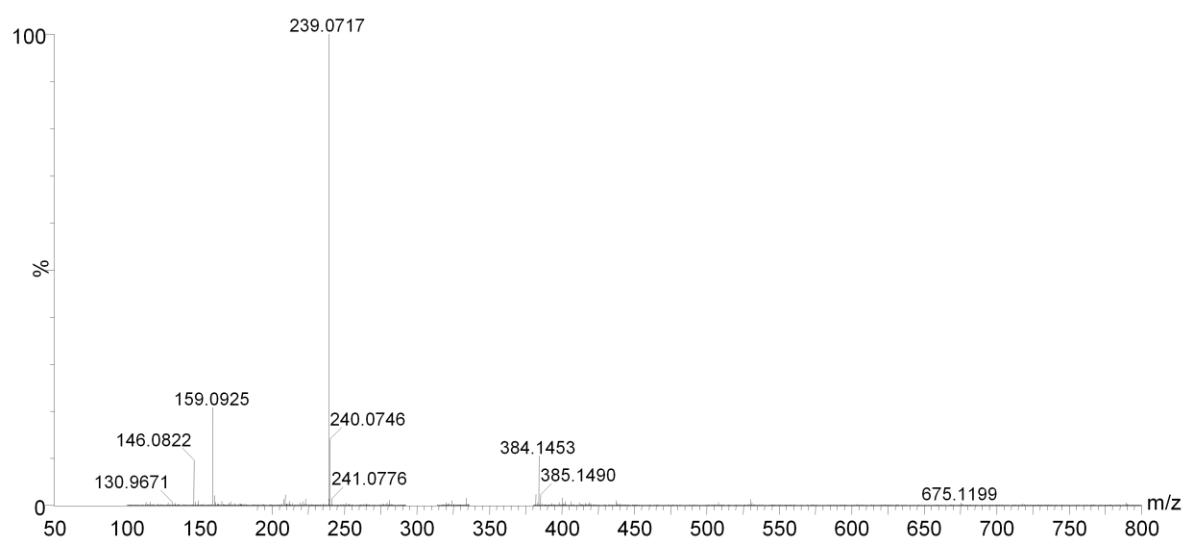

**D)**

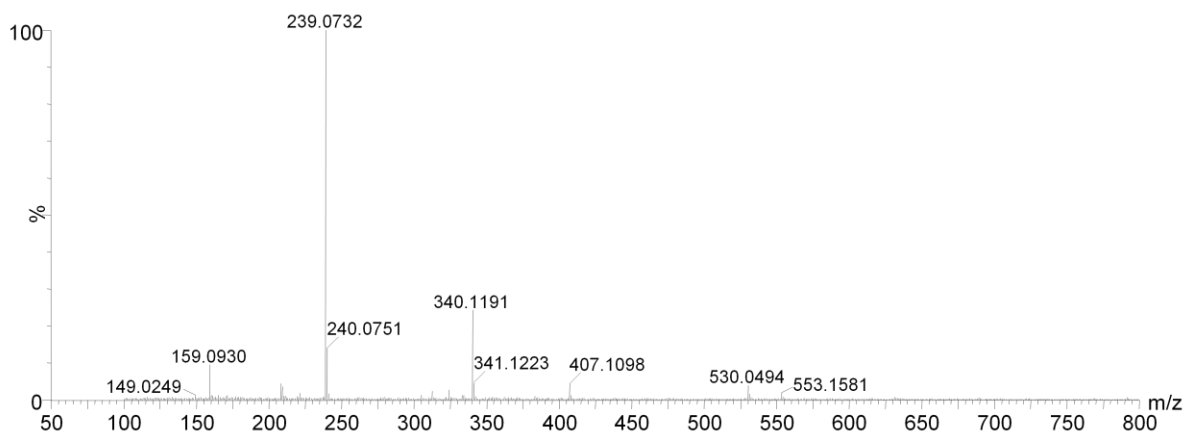

**E)**

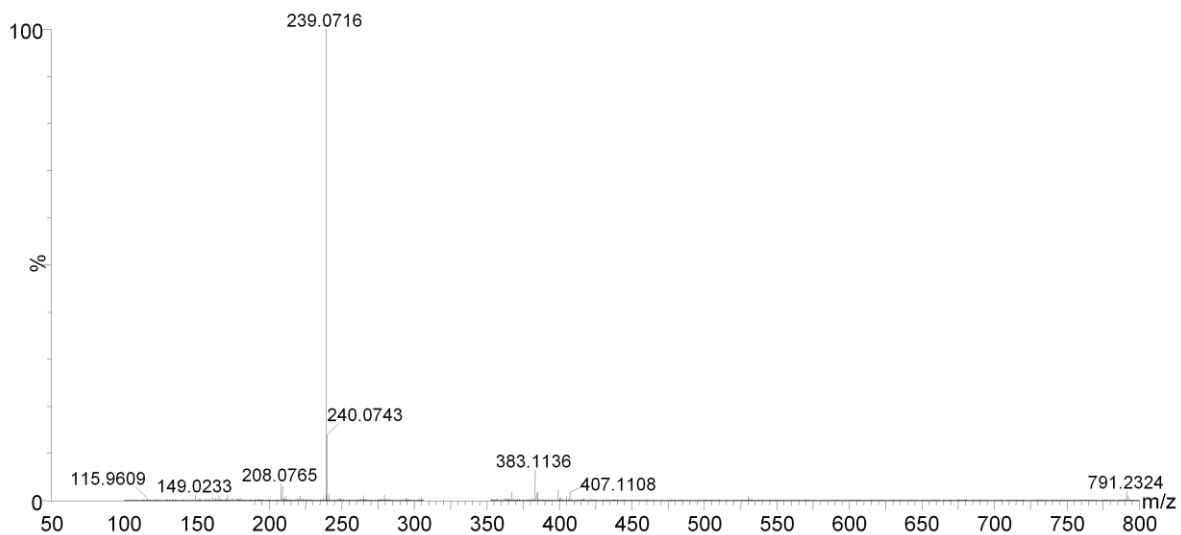

**F)**

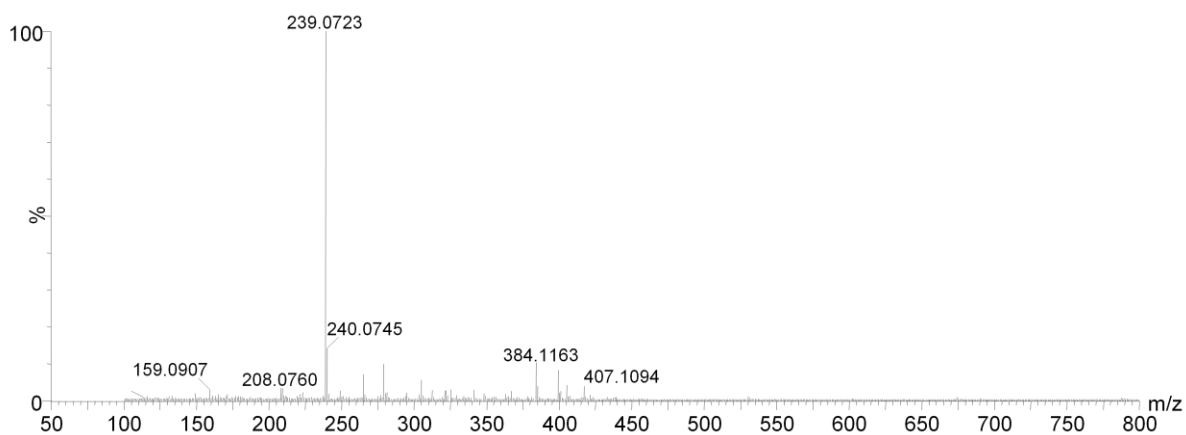

**Supplementary figure S5. HPLC-PDA-QTOF-HR ESI/MS analysis of 3-HF with different**

NDP-sugar donors and YjiC. A) 3-HF 3-*O*- $\beta$ -D-glucoside, B) 3-HF 3-*O*- $\beta$ -D-galactoside, C) 3-HF 3-*O*- $\beta$ -D-viosaminoside, D) 3-HF 3-*O*- $\beta$ -D-2-deoxy glucoside, E) 3-HF 3-*O*- $\beta$ -L-fucoside, F) 3-HF 3-*O*- $\beta$ -L-rhamnoside (See supplementary table 2 for observed mass, ion formula and calculated mass and for structures of each compounds see supplementary figure S6 or figure 4).

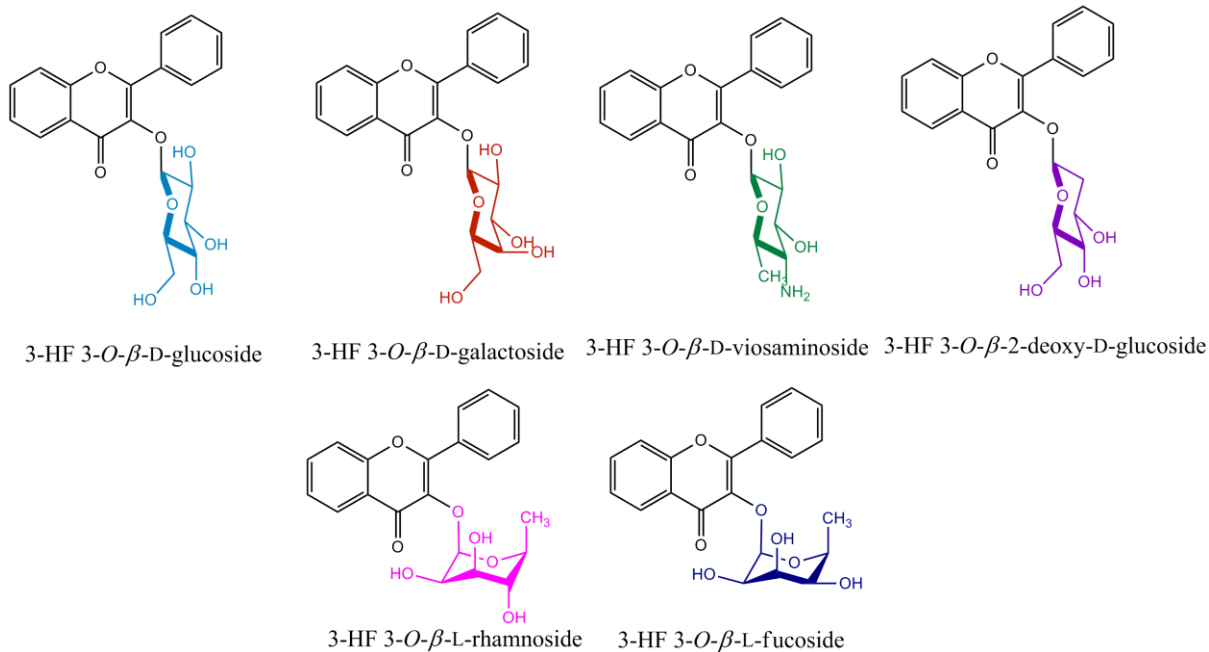

**Supplementary figure S6.** Structures of glycorandomized reaction products of YjiC catalyzed reactions of 3-HF and diverse kinds of NDP-D/L-sugars.
